# Supplementary material for: Reduction of lead dioxide with oxalic acid to prepare lead oxide as the positive electrode material for lead acid batteries
Source: Royal Society of Chemistry journal article supplement (doi:10.1039/c6ra23671e), 2016-01-01
Supplement: c6ra23671e1.pdf [file c6ra23671e1.pdf]

## Electronic Supplementary Information

### **Reduction of lead dioxide with oxalic acid to prepare lead oxide as the positive electrode material for lead acid batteries**

Wei Liu,<sup>a</sup> Beibei Ma,<sup>a</sup> Fajun Li,<sup>a</sup> Yan Fu,<sup>b</sup> Jian Tai,<sup>a</sup> Yanqing Zhou<sup>a</sup> and Lixu Lei<sup>a\*</sup>

<sup>a</sup> School of Chemistry and Chemical Engineering, Southeast University, Nanjing, 211189, P. R. China

<sup>b</sup> Office of Academic Affairs, Southeast University, Nanjing, 211189, P. R. China

\* E-mail address: [lixu.lei@seu.edu.cn](mailto:lixu.lei@seu.edu.cn); Tel.: +86-25-52090620-6421; Fax: +86-25-52090618.

## Tables

**Table S1**

The composition of the reductive products calculated from the content of C element.

| $r^a$ | $w_1^b$<br>(wt.%) | Composition (wt.%) <sup>c</sup> |                  |
|-------|-------------------|---------------------------------|------------------|
|       |                   | PbC <sub>2</sub> O <sub>4</sub> | PbO <sub>2</sub> |
| 1     | 3.39              | 41.7                            | 58.3             |
| 2     | 5.67              | 69.7                            | 30.3             |
| 3     | 7.46              | 91.8                            | 8.2              |
| 4     | 7.37              | 90.7                            | 9.3              |

<sup>a</sup>  $r = n(\text{H}_2\text{C}_2\text{O}_4) / n(\text{PbO}_2)$ ;

<sup>b</sup>  $w_1$  is the mass percentage of C element in the reductive products;

<sup>c</sup> The mass percentage of PbC<sub>2</sub>O<sub>4</sub> ( $w_2$ ) was calculated through the formula:

$$w_2 = \frac{w_1}{2 \times M_{r(\text{C})}} \times M_{r(\text{PbC}_2\text{O}_4)}$$

**Table S2**

The composition and theoretical capacity of the samples A400, A450, A500 and A550.

| Sample | Composition (wt.%) <sup>*</sup> |       |       | Theoretical capacity<br>(mAh g <sup>-1</sup> ) |
|--------|---------------------------------|-------|-------|------------------------------------------------|
|        | Pb <sub>3</sub> O <sub>4</sub>  | α-PbO | β-PbO |                                                |
| A400   | 42.7                            | 57.3  | –     | 237.8                                          |
| A450   | 51.1                            | 48.9  | –     | 237.3                                          |
| A500   | 6.5                             | 90.4  | 3.1   | 239.5                                          |
| A550   | –                               | 14.9  | 85.1  | 240.1                                          |

<sup>\*</sup> The compositions were determined according to the XRD patterns shown in Fig. 4 with the Jade<sup>®</sup> software.

The theoretical discharge capacity  $C$  in mAh g<sup>-1</sup> of the mixture containing  $x\%$  Pb<sub>3</sub>O<sub>4</sub> and  $(1-x)\%$  PbO can be calculated from the formula:

$$C = 53600 \times \left( \frac{3x}{M_{r(\text{Pb}_3\text{O}_4)}} + \frac{1-x}{M_{r(\text{PbO})}} \right)$$

Consequently, the theoretical capacity of A400, A450, A500 and A550 are 237.8, 237.3, 239.5 and 240.1 mAh g<sup>-1</sup>, respectively.

## Figures

### Materials and chemicals

3,3,5,5-tetramethylbenzidine (TMB), dimethyl sulfoxide (DMSO) and horseradish peroxidase (HRP) were purchased from Sinopharm Chemical Reagent Co., Ltd. (China).

### Method

H<sub>2</sub>O<sub>2</sub> detection was carried out as follows: after 1 h reduction reaction, 4 mL of reaction solution was firstly taken out and the solid particles were filtered from the solution. Secondly, 500  $\mu$ L of the filtered solution, 200  $\mu$ L of TMB solution (16 mM, DMSO) and 20  $\mu$ L of HRP (1 mg mL<sup>-1</sup>) were mixed in 5 mL of phosphate buffer solution (PBS, 10 mM, pH 7.4). Subsequently, the mixture was incubated for 30 min at 35 °C in a water bath. The blank experiment was carried by using 500  $\mu$ L of deionized water to replace the filtered solution.

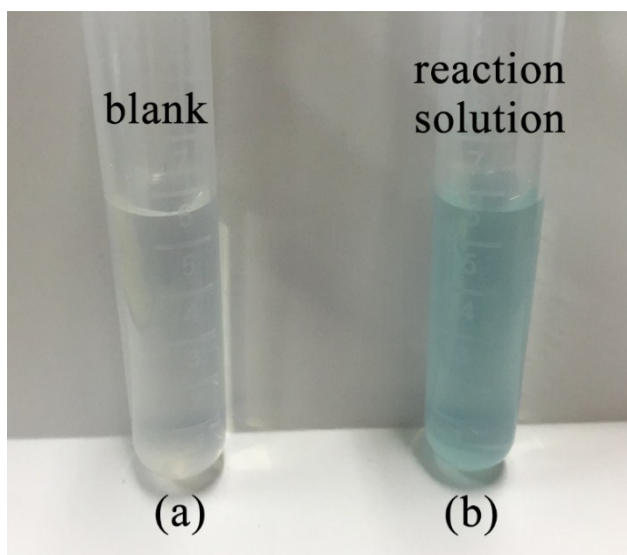

**Fig. S1** Photographs of chromogenic reactions in different systems: (a) TMB + HRP + H<sub>2</sub>O (blank) and (b) TMB + HRP + reaction solution.

As shown in Fig. S1, TMB was oxidized producing a blue color in the reaction solution, indicating the existence of H<sub>2</sub>O<sub>2</sub>.

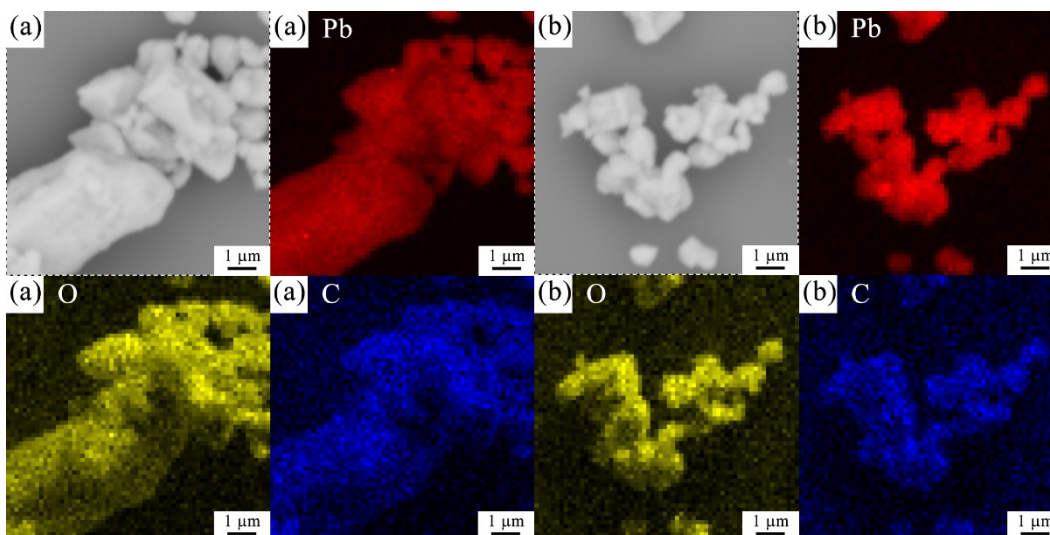

**Fig. S2** (a and b) EDS mapping analysis of the reduction products prepared in 0.2 mol L<sup>-1</sup> of H<sub>2</sub>C<sub>2</sub>O<sub>4</sub> solution.

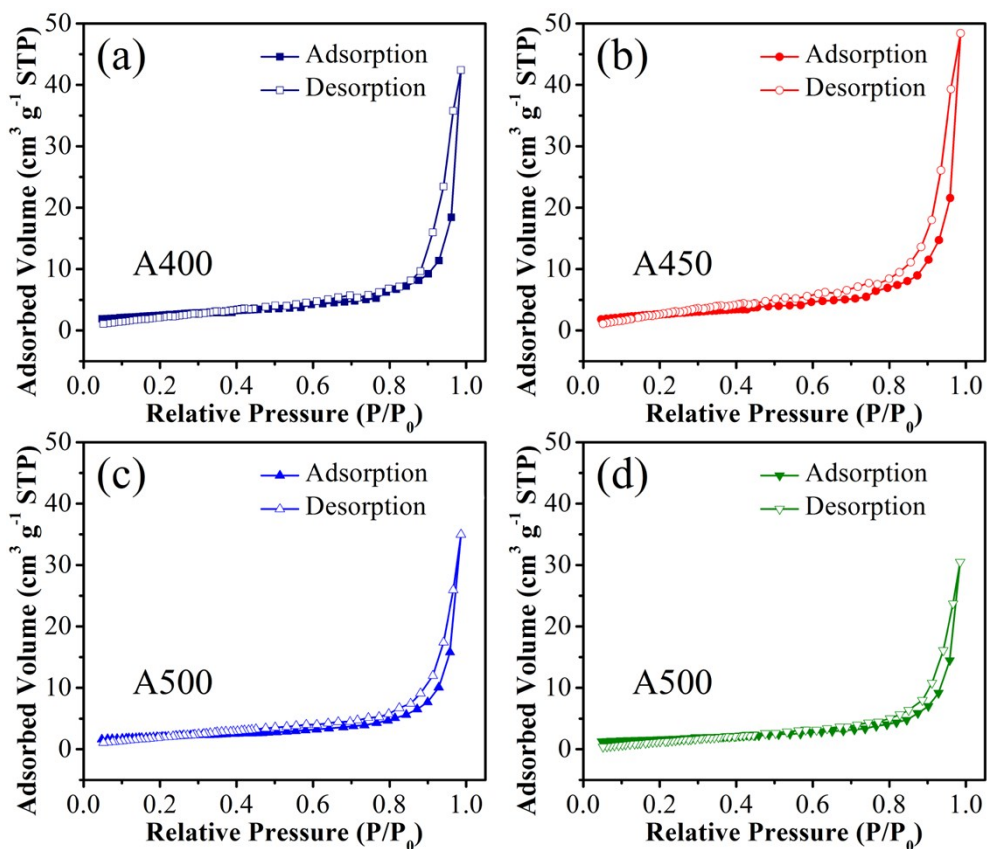

**Fig. S3** N<sub>2</sub> adsorption–desorption isotherms of (a) A400, (b) A450, (c) A500 and (d) A550 samples after formation.

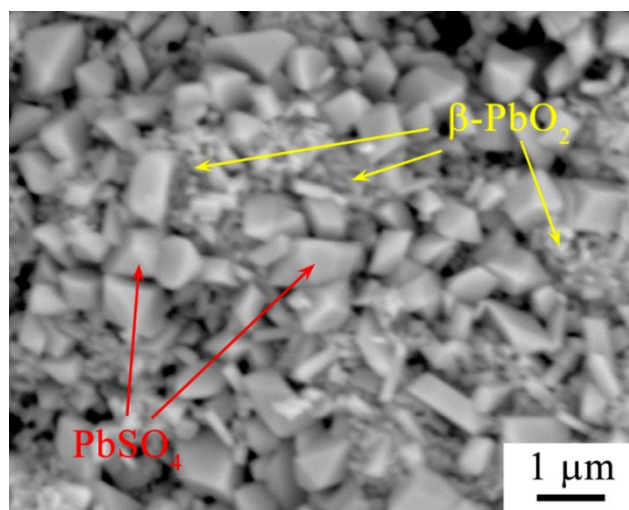

**Fig. S4** SEM micrograph of A450 electrode after soaking in H<sub>2</sub>SO<sub>4</sub> solution for 2 hour.
